# Supplementary material for: Facile synthesis of ZIF-67 derived dodecahedral C/NiCO2S4 with broadband microwave absorption performance
Source: Royal Society of Chemistry journal article supplement (doi:10.1039/d2nr02490j), 2022-01-01
Supplement: d2nr02490j1.pdf [file d2nr02490j1.pdf]

**Facile synthesis of ZIF-67 Derived Dodecahedral C/NiCO<sub>2</sub>S<sub>4</sub>  
with broadband microwave absorption performance**

**Congyu Zhou<sup>a</sup>, Zhengjun Yao<sup>a,\*</sup>, Bo Wei<sup>a</sup>, Wenying Li<sup>a</sup>, Zhejia Li<sup>a</sup>, Xuewei  
Tao<sup>b</sup>, Jintang Zhou<sup>a,\*</sup>**

*<sup>a</sup> College of Materials and Technology, Nanjing University of Aeronautics and  
Astronautics, Nanjing 211100, China*

*<sup>b</sup> School of Materials Science and Engineering, Nanjing Institute of Technology,  
Nanjing 211167, China*

Correspondence to: Zhengjun Yao

*E-mail: yaozj1921@126.com; Tel: +8613951818597*

Correspondence to: Jintang Zhou

*E-mail: imzjt@126.com; Tel: +8613814115821*

## Supporting information

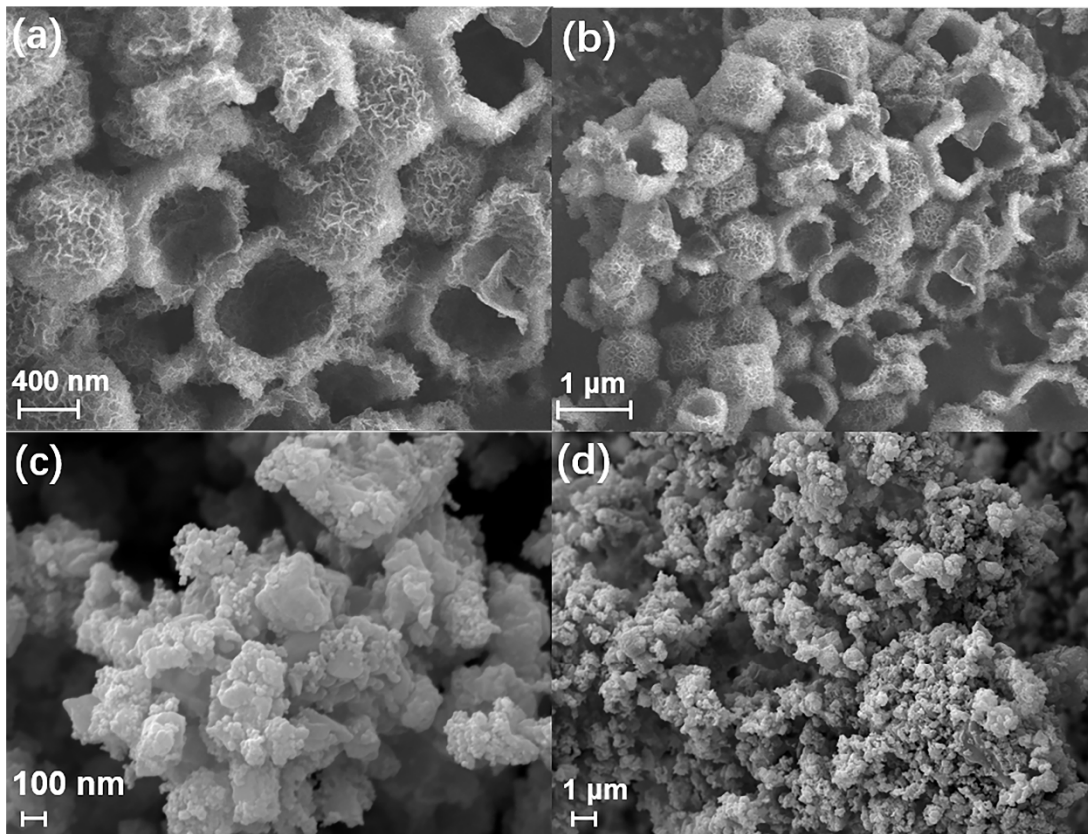

**Fig. S1.** SEM images of CNCS-10 at different scale and different state.

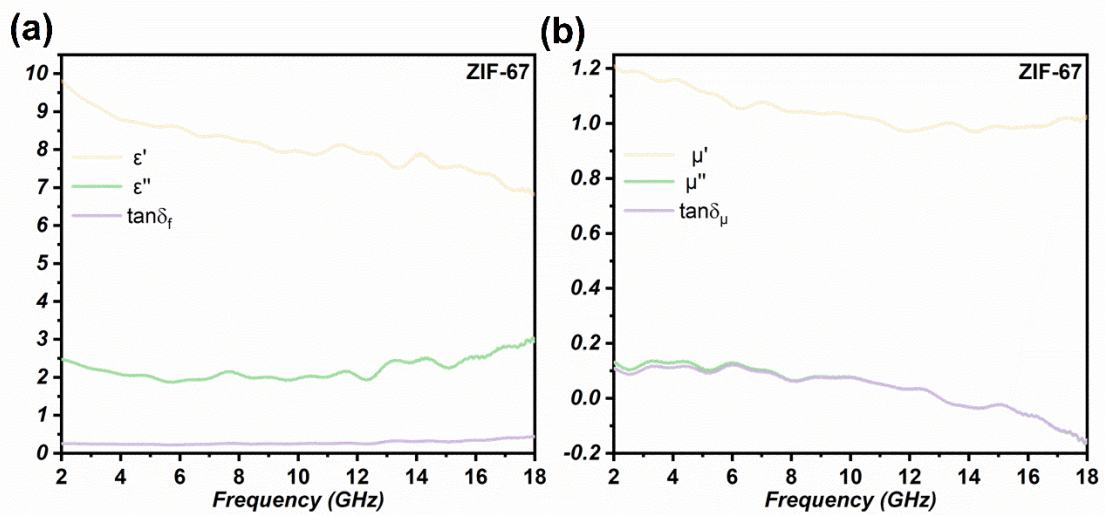

**Fig. S2** The electromagnetic parameters of ZIF-67: (a) Dielectric parameters; (b) Magnetic parameters.

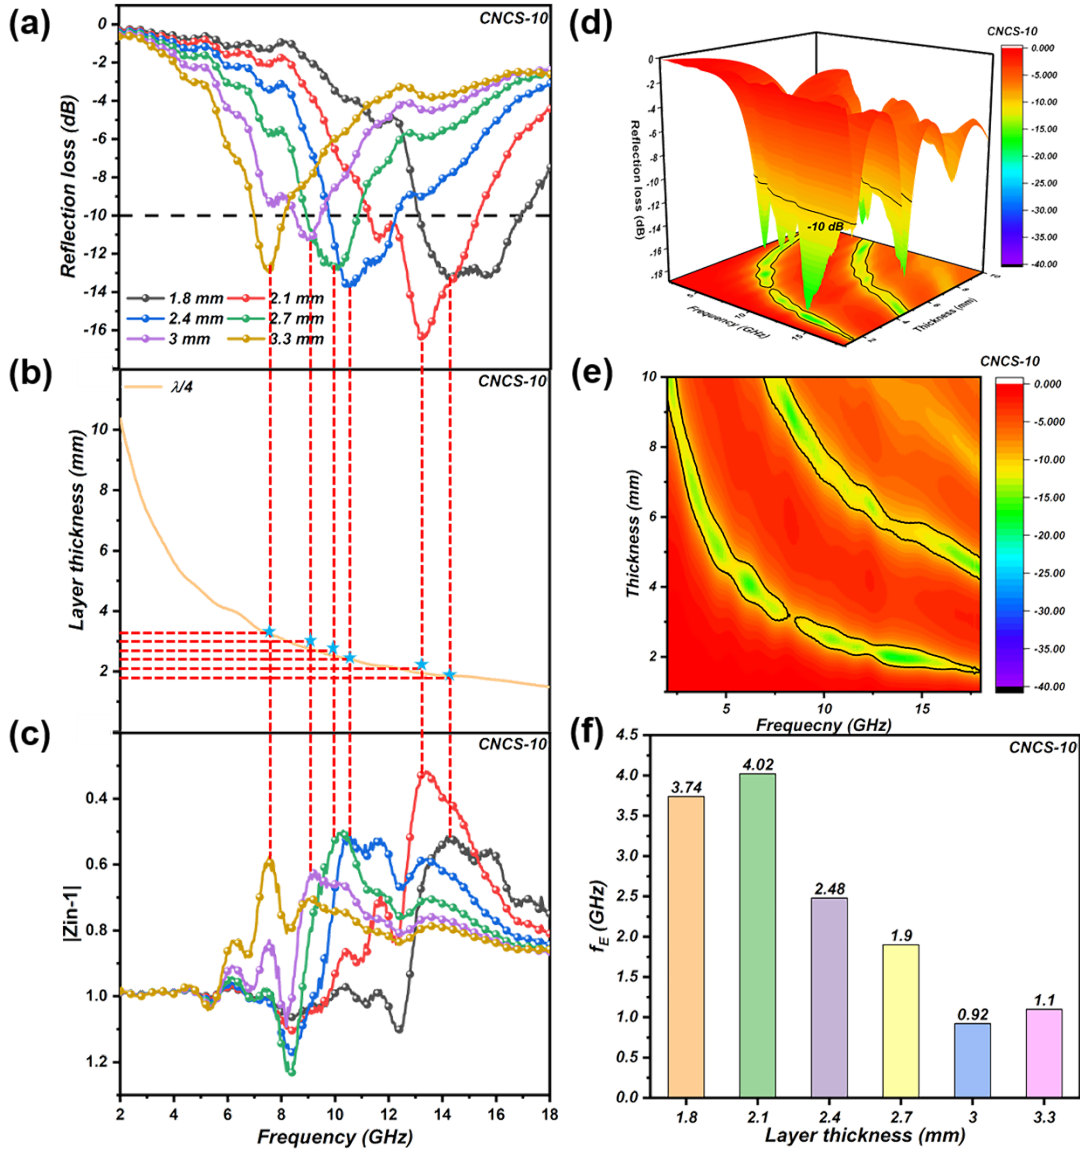

**Fig. S3.** Microwave absorbing properties of CNCS-10: (a)  $R_L$  at specific thickness; (b)  $\lambda/4$  curve; (c)  $|Z_{in}-1|$  at specific thickness; (d) Three-dimensional representation of the values of  $R_L$ ; (e) Two-dimensional representation of the values of  $R_L$ ; (f)  $f_E$  at specific thickness.

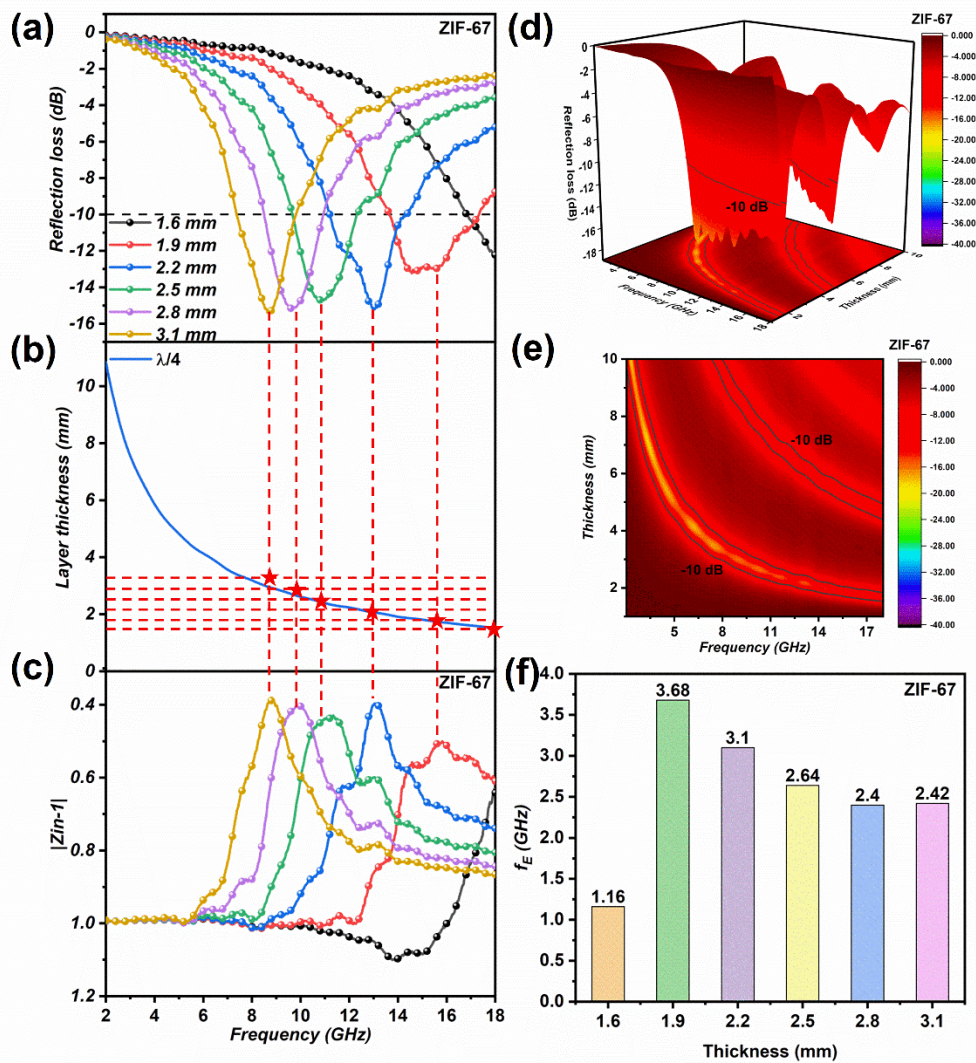

a

**Fig. S4.** Microwave absorbing properties of ZIF-67: (a)  $R_L$  at specific thickness; (b)  $\lambda/4$  curve; (c)  $|Z_{in}-1|$  at specific thickness; (d) Three-dimensional representation of the values of  $R_L$ ; (e) Two-dimensional representation of the values of  $R_L$ ; (f)  $f_E$  at specific thickness.
